# Supplementary material for: Functionalization of MWCNTs for Bioelectrocatalysis by Bacterial Two-Domain Laccase from Catenuloplanes japonicus
Source: MDPI journal article supplement (doi:10.3390/nano13233019), 2023-11-25
Supplement: s1 [file s1]

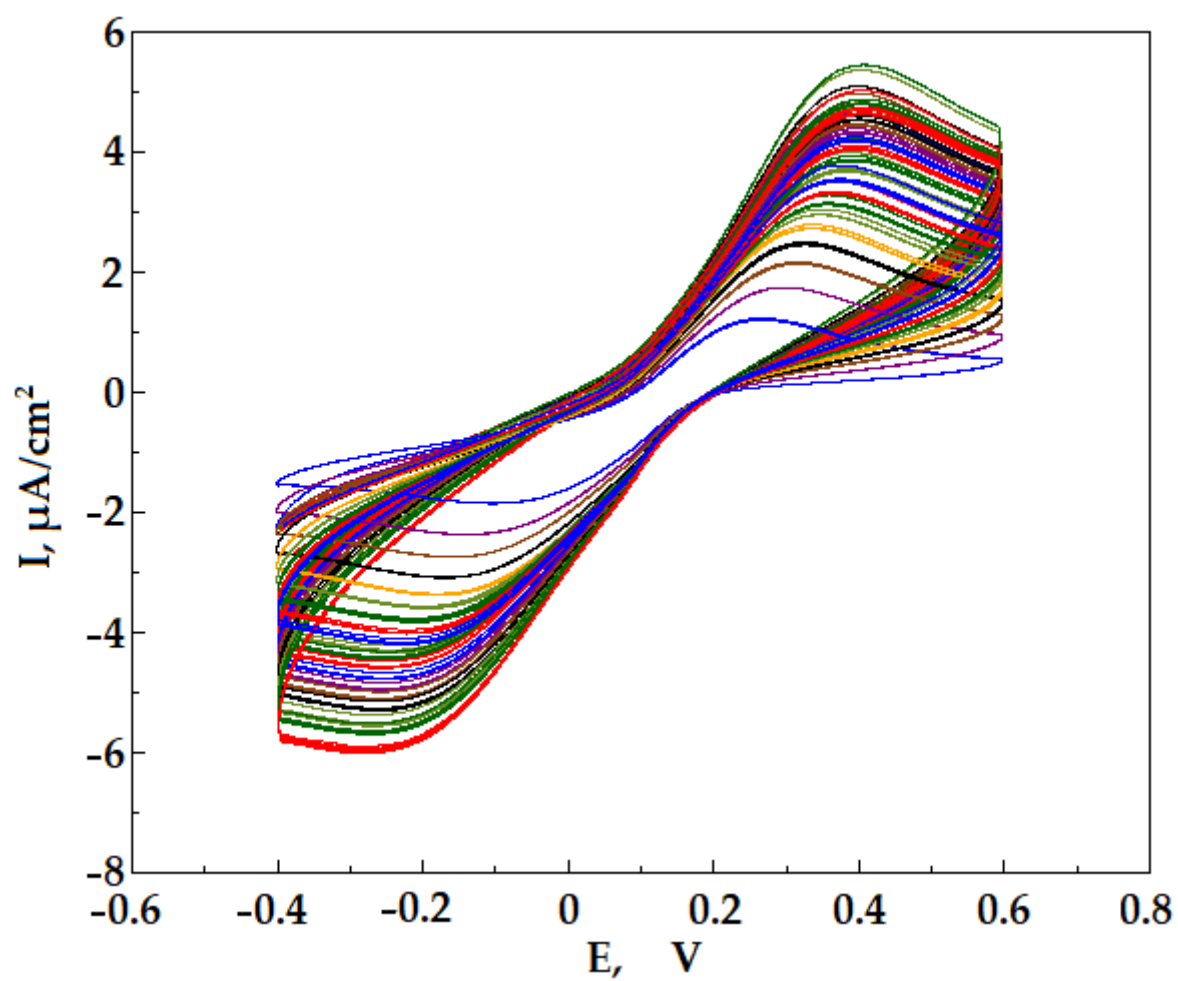

**Figure S1-1.** CVs for initial pencil core electrode in the solution of 1 mM  $\text{K}_3[\text{Fe}(\text{CN})_6]$  in 0.1 M KCl. Each colour corresponds to a different scanning rate ranging from 25 to 500 mV/s with an interval of 25 mV/s.

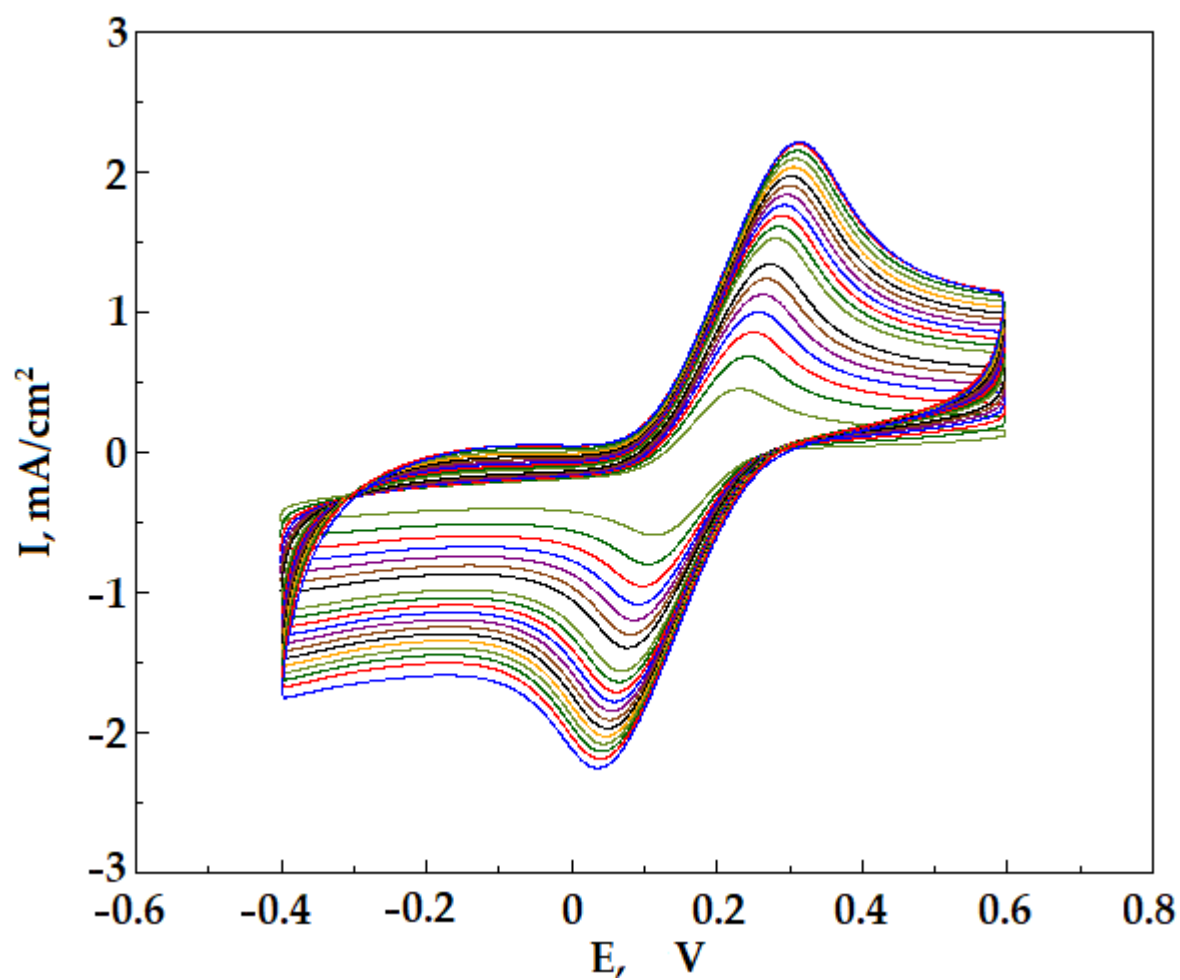

**Figure S1-2.** CVs for pencil core electrode modified with MWCNT-5 in the solution of 1 mM  $\text{K}_3[\text{Fe}(\text{CN})_6]$  in 0.1 M KCl. Each colour corresponds to a different scanning rate ranging from 25 to 500  $\text{mV}/\text{s}$  with an interval of 25  $\text{mV}/\text{s}$ .

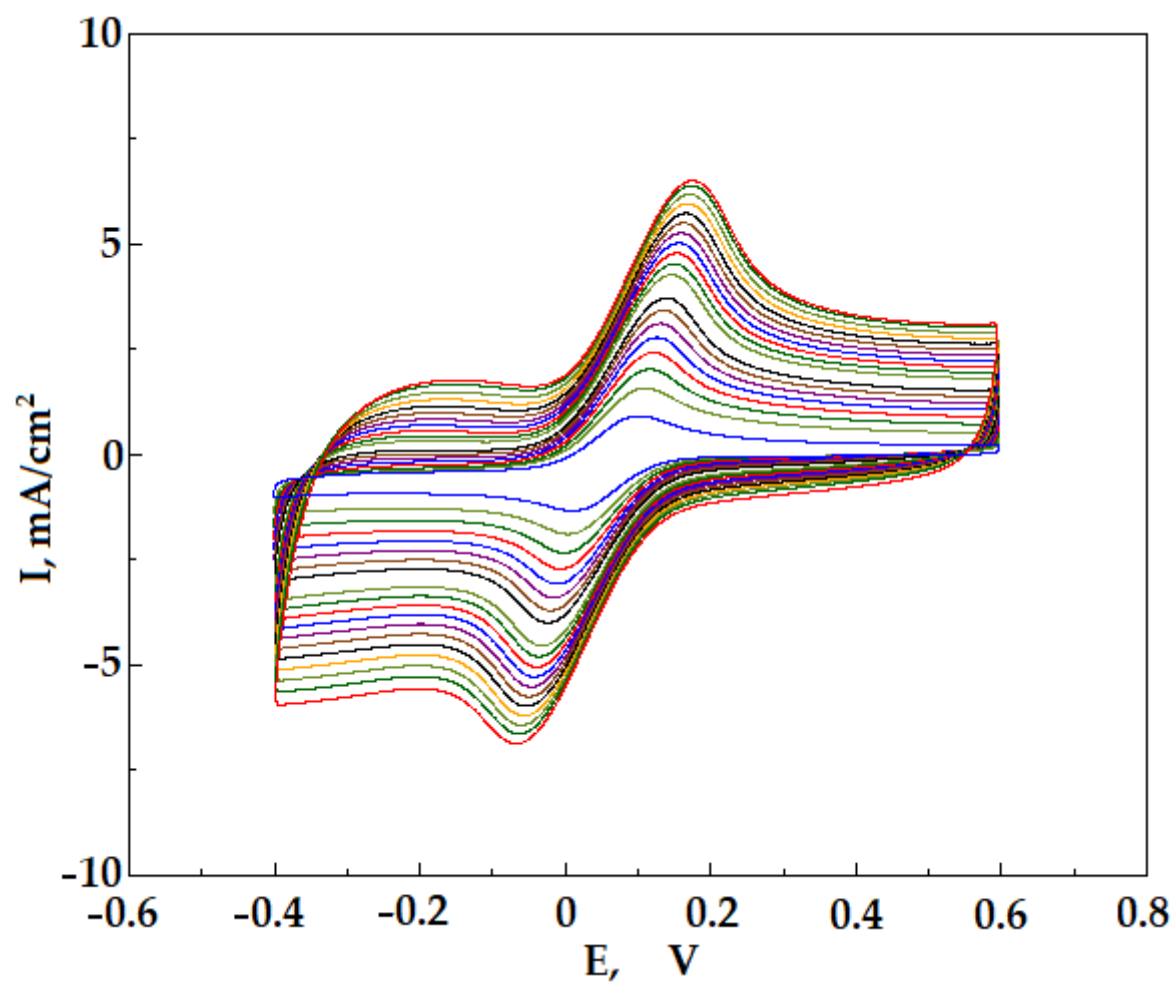

**Figure S1-3.** CVs for pencil core electrode modified with MWCNT-10 in the solution of 1 mM  $\text{K}_3[\text{Fe}(\text{CN})_6]$  in 0.1 M KCl. Each colour corresponds to a different scanning rate ranging from 25 to 500  $\text{mV}/\text{s}$  with an interval of 25  $\text{mV}/\text{s}$ .

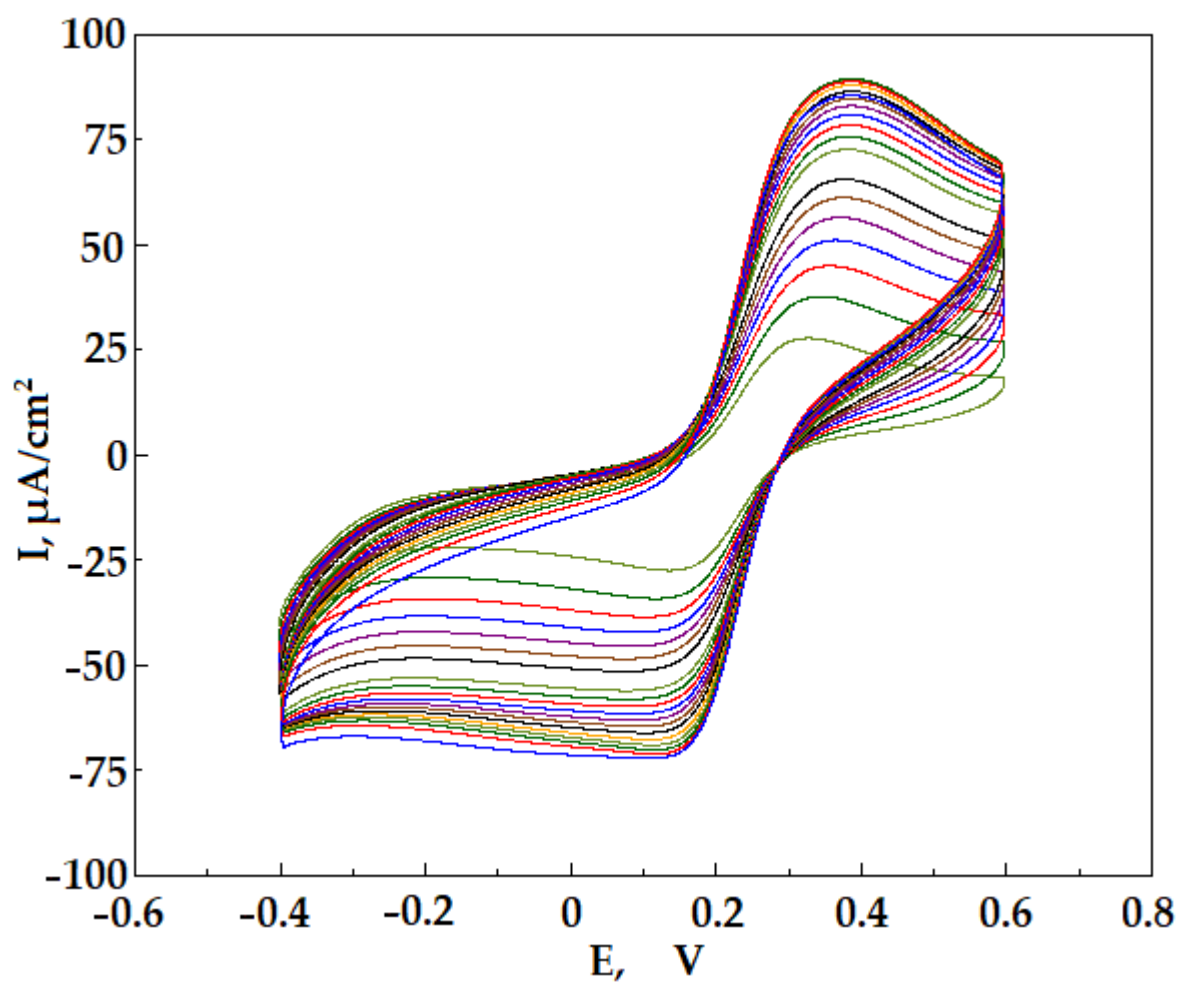

**Figure S1-4.** CVs for pencil core electrode modified with MWCNT- $\text{H}_2\text{O}_2$  in the solution of 1 mM  $\text{K}_3[\text{Fe}(\text{CN})_6]$  in 0.1 M KCl. Each colour corresponds to a different scanning rate ranging from 25 to 500 mV/s with an interval of 25 mV/s.

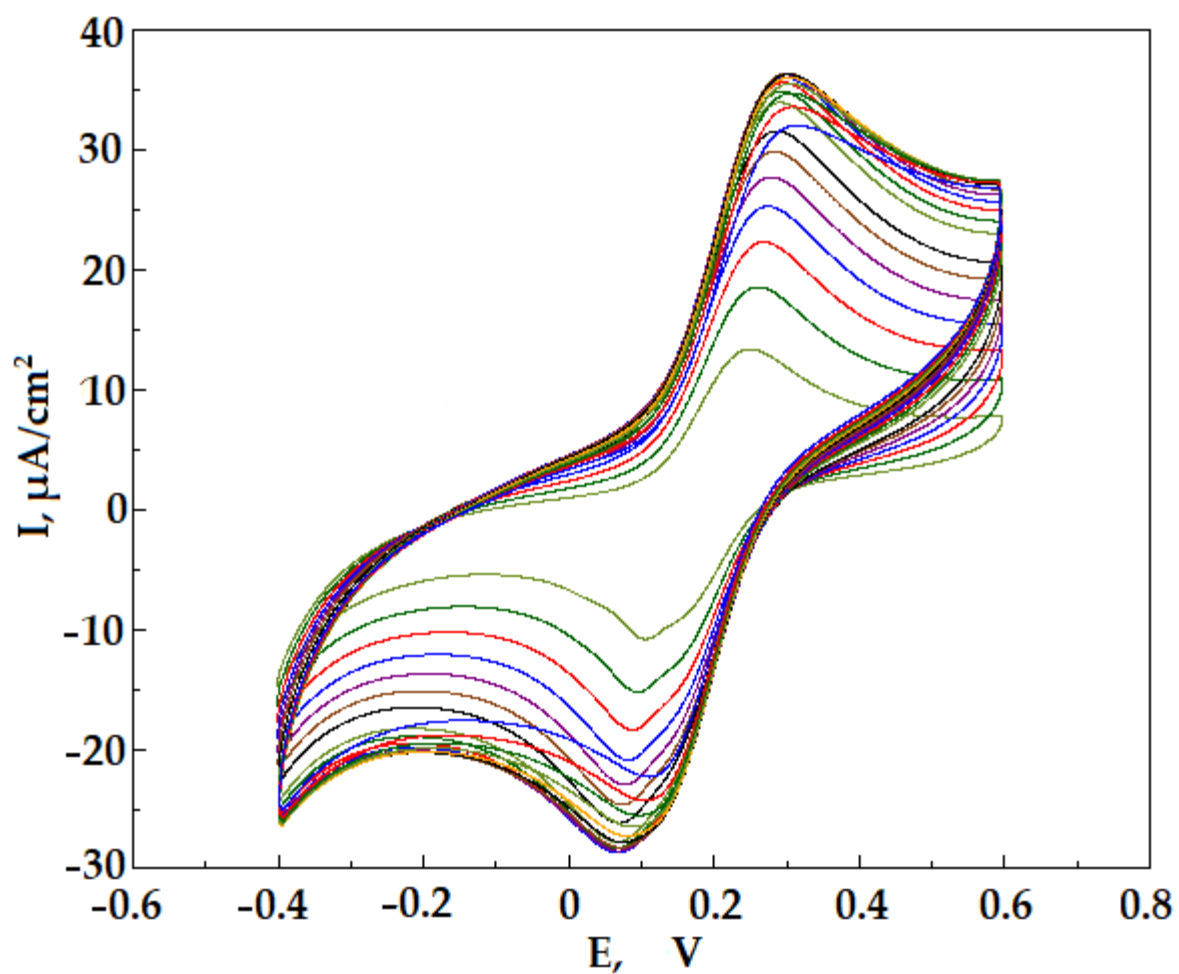

**Figure S1-5.** CVs for pencil core electrode modified with Naphthylated MWCNT in the solution of 1 mM  $\text{K}_3[\text{Fe}(\text{CN})_6]$  in 0.1 M KCl. Each colour corresponds to a different scanning rate ranging from 25 to 500  $\text{mV}/\text{s}$  with an interval of 25  $\text{mV}/\text{s}$ .
